# Supplementary material for: Development of Dual Inhibitors against Alzheimer’s Disease Using Fragment-Based QSAR and Molecular Docking
Source: Hindawi journal article supplement (doi:10.1155/2014/979606), 2014-01-01
Supplement: f1 [file 979606.f1.pdf]

## Supplementary Tables

### Supplementary Table 1

| S. No.              | Molecular Structure (2D)                                                             | pIC <sub>50</sub> (nm) |
|---------------------|--------------------------------------------------------------------------------------|------------------------|
| <b>Training Set</b> |                                                                                      |                        |
| 1                   | 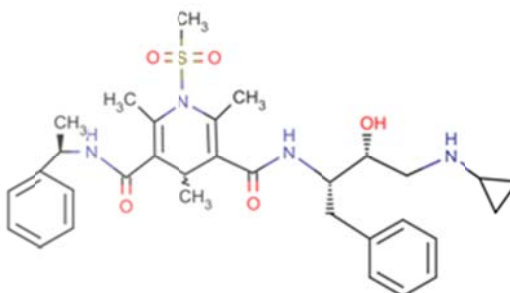   | 4.80                   |
| 2                   |   | 5.02                   |
| 3                   |  | 5.10                   |
| 4                   |  | 4.90                   |

5

4.70

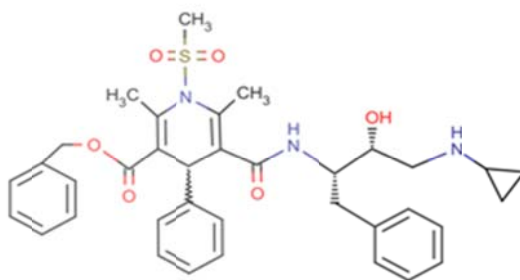

6

4.82

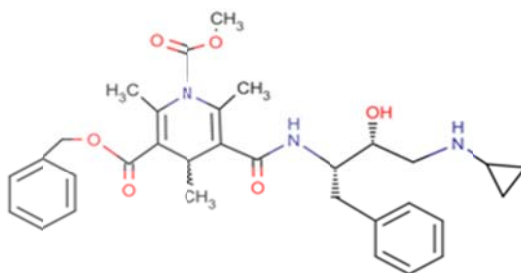

7

4.81

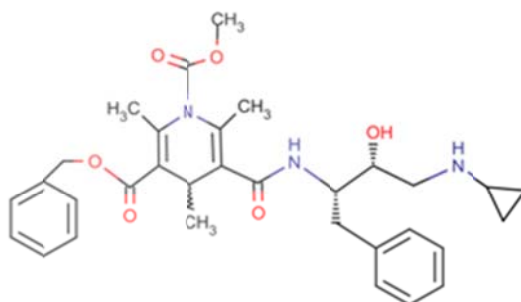

8

5.05

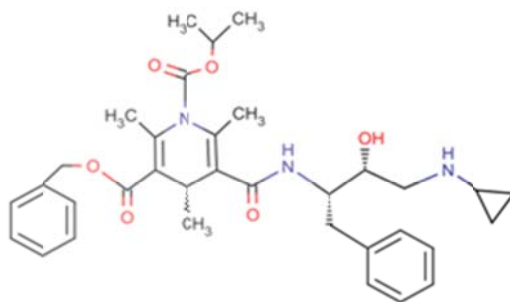

9

4.53

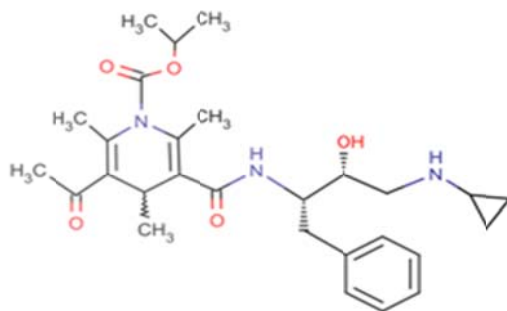

10

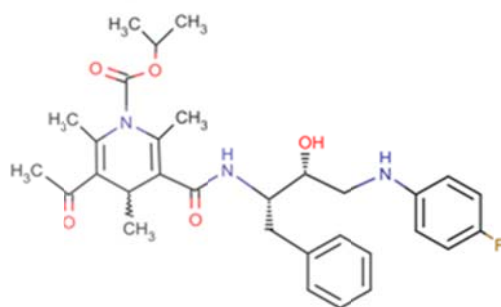

4.60

11

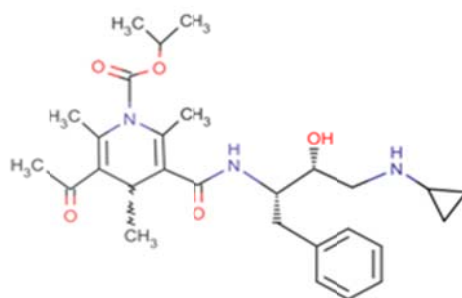

4.50

12

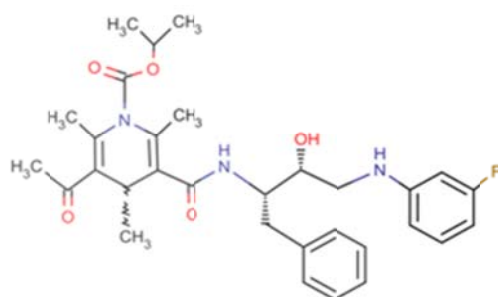

4.60

13

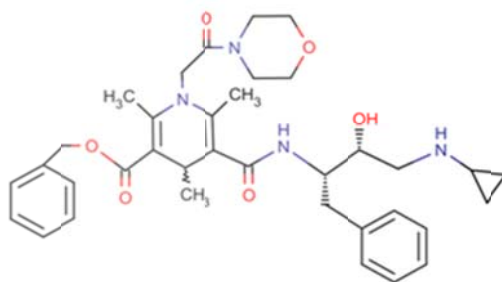

4.55

14

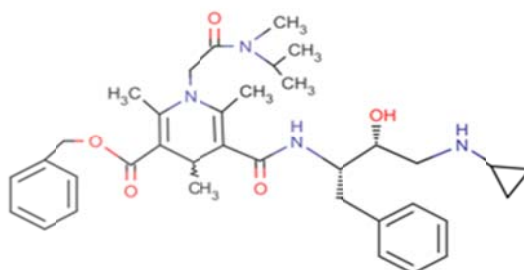

4.55

---

15

4.60

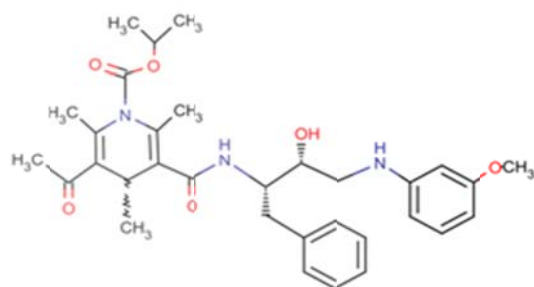

---

**Test Set**

1

4.80

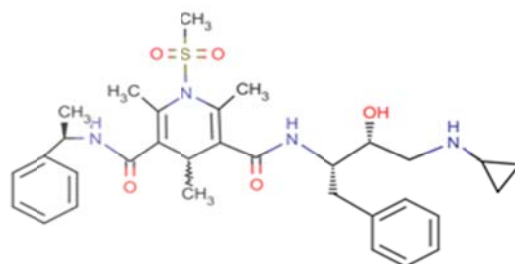

2

4.83

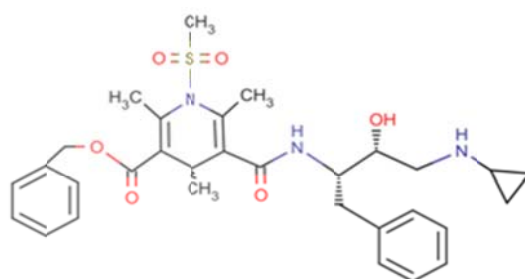

3

4.63

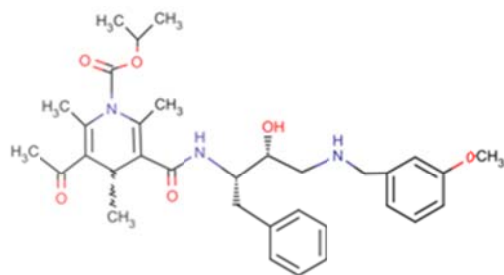

4

4.60

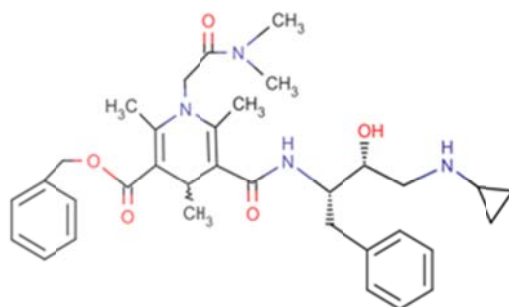

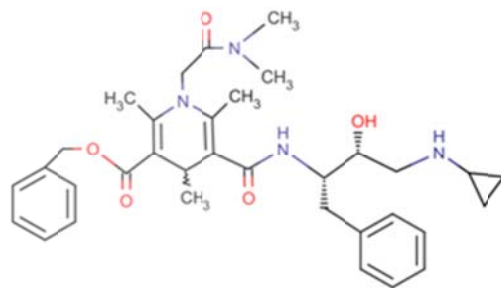

**Supplementary Table 2**

| S. No. | Actual activity<br>(pIC <sub>50</sub> in nm) | Selected Descriptors |                      |                | Predicted activity<br>(pIC <sub>50</sub> in nm) |
|--------|----------------------------------------------|----------------------|----------------------|----------------|-------------------------------------------------|
|        |                                              | R1-<br>NitrogenCount | R2-<br>DeltaEpsilonA | R3-<br>k3alpha |                                                 |
| 1      | 4.80                                         | 1                    | 0                    | 0              | 4.80                                            |
| 2      | 4.80                                         | 1                    | 0                    | 0              | 4.80                                            |
| 3      | 4.83                                         | 0                    | 0                    | 0              | 4.95                                            |
| 4      | 5.02                                         | 0                    | 0                    | 0              | 4.95                                            |
| 5      | 5.10                                         | 0                    | 0                    | 0              | 4.95                                            |
| 6      | 4.90                                         | 0                    | 0                    | 0              | 4.95                                            |
| 7      | 4.70                                         | 0                    | 0.067                | 0              | 4.71                                            |
| 8      | 4.82                                         | 0                    | 0                    | 3.63           | 4.95                                            |
| 9      | 4.81                                         | 0                    | 0                    | 5.01           | 4.95                                            |
| 10     | 5.05                                         | 0                    | 0                    | 5.63           | 4.95                                            |
| 11     | 4.53                                         | 0                    | 0                    | 5.63           | 4.57                                            |
| 12     | 4.60                                         | 0                    | 0                    | 5.63           | 4.57                                            |
| 13     | 4.50                                         | 0                    | 0                    | 5.63           | 4.57                                            |
| 14     | 4.60                                         | 0                    | 0                    | 5.63           | 4.60                                            |
| 15     | 4.60                                         | 0                    | 0                    | 5.63           | 4.57                                            |
| 16     | 4.63                                         | 0                    | 0                    | 5.63           | 4.57                                            |
| 17     | 4.60                                         | 0                    | 0                    | 2.63           | 4.54                                            |
| 18     | 4.41                                         | 0                    | 0                    | 2.63           | 4.54                                            |
| 19     | 4.55                                         | 0                    | 0                    | 1.77           | 4.54                                            |
| 20     | 4.55                                         | 0                    | 0                    | 2.52           | 4.54                                            |
